# Supplementary material for: In silico hippocampal modeling for multi-target pharmacotherapy in schizophrenia
Source: PubMed Central journal article supplement (PMC7506542; doi:10.1038/s41537-020-00109-0), 2020-09-21
Supplement: 41537_2020_109_MOESM1_ESM.pdf [file 41537_2020_109_MOESM1_ESM.pdf]

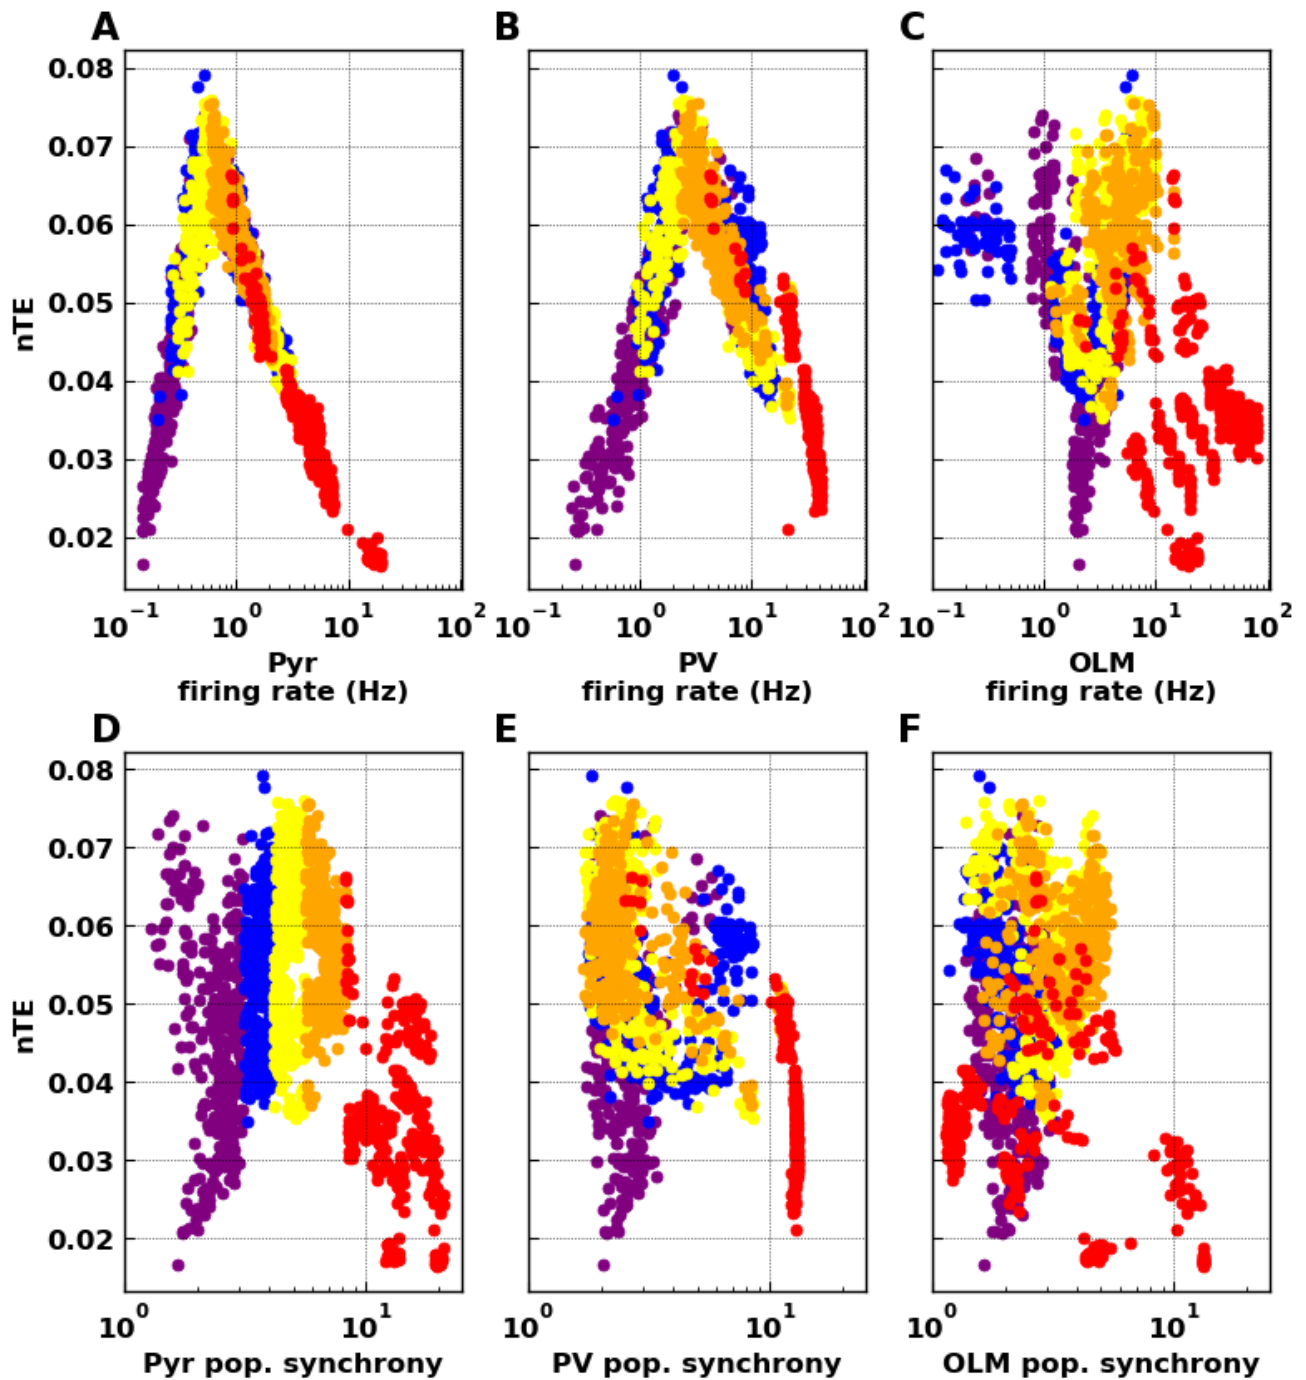

**Suppl. Fig. 1: Pyramidal and basket cell population firing rates and synchrony were associated with information flow changes.**

Variability of population firing measured with population synchrony. Points in the panels, representing individual simulations, are color-coded according to quintiles measured for pyramidal population synchrony. For pyramidal and PV populations, quintiles show a general consistency across these 4 measures. There was no clear relationship between OLM interneuronal firing pattern and information flow (panels C and F).
